# Supplementary material for: An Optimal Artificial Intelligence System for Real-Time Endoscopic Prediction of Invasion Depth in Early Gastric Cancer
Source: MDPI journal article supplement (doi:10.3390/cancers14236000), 2022-12-05
Supplement: s1 [file s1]

**Table S1.** Diagnostic performance of depth prediction of video classifier (VC) with LSTM layers for endoscopic videos.

| <b>Predicting depth</b> | <b>Frame-by-frame</b> | <b>Voting</b> | <b>Average</b> |
|-------------------------|-----------------------|---------------|----------------|
| Accuracy (%)            | 79.5                  | 76.1          | 79.1           |
| Sensitivity (%)         | 76.8                  | 70.5          | 72.7           |
| Specificity (%)         | 82.8                  | 87.0          | 91.3           |
| PPV (%)                 | 84.9                  | 91.2          | 94.1           |
| NPV (%)                 | 74.0                  | 60.6          | 63.6           |
| AUC                     | 0.833                 |               |                |

PPV, positive predictive value; NPV, negative predictive value; AUC, area under the curve.
