# Supplementary material for: An Optimal Artificial Intelligence System for Real-Time Endoscopic Prediction of Invasion Depth in Early Gastric Cancer
Source: Cancers (Basel). 2022 Dec 5;14(23):6000. doi: 10.3390/cancers14236000 (PMC9741000; doi:10.3390/cancers14236000)
Supplement: Supplementary file 1 [file cancers-14-06000-s001.zip]

Archive with 6 entries (6 files):
- Suppl Figure S1.tif
- Suppl Figure S2.tif
- Suppl Table S1.pdf
- Video S1.mp4
- Video S2.mp4
- Video Suppl.pdf
